# Supplementary material for: High endogenous CCL2 expression promotes the aggressive phenotype of human inflammatory breast cancer
Source: PubMed Central journal article supplement (PMC8617270; doi:10.1038/s41467-021-27108-8), 2021-11-25
Supplement: 41467_2021_27108_MOESM2_ESM.pdf [file 41467_2021_27108_MOESM2_ESM.pdf]

**Title:** Supplementary Data 1:

**Description:** A3250 Canonical Pathways by IPA Analysis in vitro and in vivo. Values shown are  $(-\log(p\text{-value}))$ .  $n=3$  biologically independent tumor samples,  $n=1$  independent in vitro sample.

**Title:** Supplementary Data 2:

**Description:** IPA differential analysis showing both activated and inactivated pathways in A3250 compared to MDA-MB-231 tumor cells.  $n=3$  independent in vitro samples per cell line. We used Fisher's exact test to determine pathways significantly enriched among DEGs. ( $p < 0.05$ ;  $-\log p\text{-value} > 1.3$ ).

**Title:** Supplementary Data 3:

**Description:** IPA differential analysis showing both activated and inactivated pathways in A3250 compared IBC3 tumor cells.  $n=3$  independent in vitro samples per cell line. We used Fisher's exact test to determine pathways significantly enriched among DEGs. ( $p < 0.05$ ;  $-\log p\text{-value} > 1.3$ ).

**Title:** Supplementary Data 4:

**Description:** IPA differential analysis showing both activated and inactivated pathways in A3250 compared SUM149 tumor cells.  $n=3$  independent in vitro samples per cell line. We used Fisher's exact test to determine pathways significantly enriched among DEGs. ( $p < 0.05$ ;  $-\log p\text{-value} > 1.3$ ).

**Title:** Supplementary Data 5:

**Description:** Upstream regulators activated or inhibited in A3250 compared to MDA-MB-231 tumor cells.  $n=3$  independent in vitro samples per cell line. We used Fisher's exact test to determine significantly activated or inhibited upstream regulators ( $p < 0.05$ ).

**Title:** Supplementary Data 6:

**Description:** Upstream regulators activated or inhibited in A3250 compared to IBC3 tumor cells.  $n=3$  independent in vitro samples per cell line. We used Fisher's exact test to determine significantly activated or inhibited upstream regulators ( $p < 0.05$ ).

**Title:** Supplementary Data 7:

**Description:** Upstream regulators activated or inhibited in A3250 compared to SUM149 tumor cells.  $n=3$  independent in vitro samples per cell line. We used Fisher's exact test to determine significantly activated or inhibited upstream regulators ( $p < 0.05$ ).

**Title:** Supplementary Data 8:

**Description:** Expression of human chemokines by A3250 tumors and cells in vitro determined by mRNA-Seq. Values shown are FPKM. Criteria for classifying a gene as expressed is  $\text{FPKM} \geq 1$  in all samples for the gene analyzed.  $n=3$  biologically independent tumor samples and  $n=1$  in vitro sample

in Experiment 1.  $n=3$  independent in vitro samples in Experiment 2. FPKM, Fragments Per Kilobase of exon per Million mapped reads.
